# Supplementary material
Source: ML conference proceedings conference paper supplement (https://proceedings.mlr.press/v37/plessis15.html)
Supplement: Supplementary file 1 [file plessis15-supp.pdf]

## A. Proofs

### A.1. Proof of Theorem 1

If the composite loss  $\tilde{\ell}(z)$  is convex, it is linear.

**Proof:** The composite loss is an odd function:

$$\tilde{\ell}(-z) = \ell(-z) - \ell(z) = -\tilde{\ell}(z),$$

Therefore,  $\frac{d^2}{dz^2}\tilde{\ell}(z) = -\frac{d^2}{dz^2}\tilde{\ell}(-z)$ . If the composite loss  $\tilde{\ell}(z)$  is convex,  $\frac{d^2}{dz^2}\tilde{\ell}(z) \geq 0$  holds for all  $z$ . Since the convexity of  $\tilde{\ell}(z)$  implies the convexity of  $\tilde{\ell}(-z)$ ,  $\frac{d^2}{dz^2}\tilde{\ell}(-z) \geq 0$  should also hold for all  $z$ . However, if  $\frac{d^2}{dz^2}\tilde{\ell}(z) > 0$ , then  $\frac{d^2}{dz^2}\tilde{\ell}(-z) < 0$  holds, which is contradictory to the convexity of  $\tilde{\ell}(-z)$ . Therefore,  $\frac{d^2}{dz^2}\tilde{\ell}(z) = 0$  should hold, which is satisfied only when  $\tilde{\ell}(z)$  is linear.  $\square$

### A.2. Proof of Lemma 2

$J_S(\alpha)$  is strongly convex in  $\alpha$  with parameter at least  $\lambda$ , and thus

$$\begin{aligned} J_S(\alpha) &\geq J_S(\alpha_S^*) + \nabla J_S(\alpha_S^*)^\top (\alpha - \alpha_S^*) + \lambda \|\alpha - \alpha_S^*\|_2^2 \\ &\geq J_S(\alpha_S^*) + \lambda \|\alpha - \alpha_S^*\|_2^2, \end{aligned}$$

where we use the optimality condition  $\nabla J_S(\alpha_S^*) = \mathbf{0}$ . Similarly, we can prove the other two inequalities.  $\square$

### A.3. Proof of Lemma 3

The difference function can be written as

$$J_S(\alpha, \mathbf{u}) - J_S(\alpha) = \frac{1}{4} \alpha^\top \mathbf{u}_1 \alpha + \frac{1}{2} \mathbf{u}_2^\top \alpha - \pi \mathbf{u}_3^\top \alpha,$$

with a partial gradient

$$\frac{\partial}{\partial \alpha} (J_S(\alpha, \mathbf{u}) - J_S(\alpha)) = \frac{1}{2} \mathbf{u}_1 \alpha + \frac{1}{2} \mathbf{u}_2 - \pi \mathbf{u}_3.$$

Given the  $\delta$ -ball of  $\alpha_S^*$ , i.e.,  $B_\delta(\alpha_S^*) = \{\alpha \mid \|\alpha - \alpha_S^*\|_2 \leq \delta\}$ , it is easy to see that for any  $\alpha \in B_\delta(\alpha_S^*)$ ,

$$\|\alpha\|_2 \leq \|\alpha - \alpha_S^*\|_2 + \|\alpha_S^*\|_2 \leq 1 + M_\alpha,$$

and then

$$\left\| \frac{\partial}{\partial \alpha} (J_S(\alpha, \mathbf{u}) - J_S(\alpha)) \right\|_2 \leq \frac{1}{2} (1 + M_\alpha) \|\mathbf{u}_1\|_{\text{Fro}} + \frac{1}{2} \|\mathbf{u}_2\|_2 + \pi \|\mathbf{u}_3\|_2.$$

This means that  $J_S(\cdot, \mathbf{u}) - J_S(\cdot)$  is Lipschitz continuous on  $B_\delta(\alpha_S^*)$  with a Lipschitz constant of order  $\mathcal{O}(\|\mathbf{u}_1\|_{\text{Fro}} + \|\mathbf{u}_2\|_2 + \|\mathbf{u}_3\|_2)$ .  $\square$

### A.4. Proof of Lemma 5

The difference function can be written as

$$J_{LL}(\alpha, \mathbf{u}) - J_{LL}(\alpha) = -\pi \mathbf{u}_3^\top \alpha + u_4(\alpha).$$

Given  $\alpha \in B_\delta(\alpha_{LL}^*)$ , we have known that  $-\pi \mathbf{u}_3^\top \alpha$  is Lipschitz continuous with a Lipschitz constant of order  $\mathcal{O}(\|\mathbf{u}_3\|_2)$  in the proof of Lemma 3. Consequently,  $J_{LL}(\cdot, \mathbf{u}) - J_{LL}(\cdot)$  is Lipschitz continuous on  $B_\delta(\alpha_{LL}^*)$  with a Lipschitz constant of order  $\mathcal{O}(\|\mathbf{u}_3\|_2 + \text{Lip}(u_4))$ .  $\square$

### A.5. Proof of Lemma 7

Same as the proof of Lemma 5.  $\square$

### A.6. Proof of Theorem 4

Let  $\mathbf{u}_1$ ,  $\mathbf{u}_2$  and  $\mathbf{u}_3$  be defined as in Eq. (13). According to the *central limit theorem*,

$$\|\mathbf{u}_1\|_{\text{Fro}} = \mathcal{O}_p(n'^{-1/2}), \quad \|\mathbf{u}_2\|_2 = \mathcal{O}_p(n'^{-1/2}), \quad \|\mathbf{u}_3\|_2 = \mathcal{O}_p(n^{-1/2}),$$

as  $n, n' \rightarrow \infty$ . Thus, we have

$$\begin{aligned} \|\widehat{\boldsymbol{\alpha}}_S - \boldsymbol{\alpha}_S^*\|_2 &\leq \lambda^{-1}\omega(\mathbf{u}) \\ &= \mathcal{O}(\|\mathbf{u}_1\|_{\text{Fro}} + \|\mathbf{u}_2\|_2 + \|\mathbf{u}_3\|_2) \\ &= \mathcal{O}_p(n^{-1/2} + n'^{-1/2}) \end{aligned}$$

by Lemma 2, Lemma 3, and Proposition 6.1 in Bonnans & Shapiro (1998, p. 19).

On the other hand,

$$|\widehat{J}_S(\widehat{\boldsymbol{\alpha}}_S) - J_S(\boldsymbol{\alpha}_S^*)| \leq |\widehat{J}_S(\widehat{\boldsymbol{\alpha}}_S) - \widehat{J}_S(\boldsymbol{\alpha}_S^*)| + |\widehat{J}_S(\boldsymbol{\alpha}_S^*) - J_S(\boldsymbol{\alpha}_S^*)|,$$

in which

$$\begin{aligned} \widehat{J}_S(\widehat{\boldsymbol{\alpha}}_S) - \widehat{J}_S(\boldsymbol{\alpha}_S^*) &= (\widehat{\boldsymbol{\alpha}}_S + \boldsymbol{\alpha}_S^*)^\top \left( \frac{1}{4n'} \sum_{i=1}^{n'} \boldsymbol{\varphi}(\mathbf{x}'_i) \boldsymbol{\varphi}(\mathbf{x}'_i)^\top + \frac{\lambda}{2} I_m \right) (\widehat{\boldsymbol{\alpha}}_S - \boldsymbol{\alpha}_S^*) \\ &\quad + \left( \frac{1}{2n'} \sum_{i=1}^{n'} \boldsymbol{\varphi}(\mathbf{x}'_i) \right)^\top (\widehat{\boldsymbol{\alpha}}_S - \boldsymbol{\alpha}_S^*) - \pi \left( \frac{1}{n} \sum_{i=1}^n \boldsymbol{\varphi}(\mathbf{x}_i) \right)^\top (\widehat{\boldsymbol{\alpha}}_S - \boldsymbol{\alpha}_S^*), \\ \widehat{J}_S(\boldsymbol{\alpha}_S^*) - J_S(\boldsymbol{\alpha}_S^*) &= \frac{1}{4} \boldsymbol{\alpha}_S^{*\top} \mathbf{u}_1 \boldsymbol{\alpha}_S^* + \frac{1}{2} \mathbf{u}_2 \boldsymbol{\alpha}_S^* - \pi \mathbf{u}_3 \boldsymbol{\alpha}_S^*. \end{aligned}$$

Since  $0 \leq \varphi_j(\mathbf{x}) \leq 1$ ,  $\|\boldsymbol{\alpha}_S^*\|_2 \leq M_\alpha$  and  $\|\widehat{\boldsymbol{\alpha}}_S\|_2 \leq M_\alpha$ ,

$$\begin{aligned} |\widehat{J}_S(\widehat{\boldsymbol{\alpha}}_S) - J_S(\boldsymbol{\alpha}_S^*)| &\leq |\widehat{J}_S(\widehat{\boldsymbol{\alpha}}_S) - \widehat{J}_S(\boldsymbol{\alpha}_S^*)| + |\widehat{J}_S(\boldsymbol{\alpha}_S^*) - J_S(\boldsymbol{\alpha}_S^*)| \\ &\leq \mathcal{O}_p(\|\widehat{\boldsymbol{\alpha}}_S - \boldsymbol{\alpha}_S^*\|_2) + \mathcal{O}_p(\|\mathbf{u}_1\|_{\text{Fro}} + \|\mathbf{u}_2\|_2 + \|\mathbf{u}_3\|_2) \\ &= \mathcal{O}_p(n^{-1/2} + n'^{-1/2}), \end{aligned}$$

which completes the proof. □

### A.7. Proof of Theorem 6

Let  $\mathbf{u}_3$  and  $u_4(\boldsymbol{\alpha})$  be defined as in Eq. (14). The gradient of  $u_4$  is given by

$$\nabla u_4(\boldsymbol{\alpha}) = \frac{1}{n'} \sum_{i=1}^{n'} \frac{\boldsymbol{\varphi}(\mathbf{x}'_i)}{1 + \exp(-\boldsymbol{\varphi}(\mathbf{x}'_i)^\top \boldsymbol{\alpha})} - \int \frac{\boldsymbol{\varphi}(\mathbf{x})}{1 + \exp(-\boldsymbol{\varphi}(\mathbf{x})^\top \boldsymbol{\alpha})} p(\mathbf{x}) d\mathbf{x}.$$

According to the central limit theorem,

$$\|\mathbf{u}_3\|_2 = \mathcal{O}_p(n^{-1/2}), \quad \text{Lip}(u_4) = \mathcal{O}_p(n'^{-1/2}),$$

as  $n, n' \rightarrow \infty$ , since  $\text{Lip}(u_4) = \sup_{\boldsymbol{\alpha}} \|\nabla u_4(\boldsymbol{\alpha})\|_2$  and

$$\sup_{\boldsymbol{\alpha} \in \mathbb{R}^m, \mathbf{x} \in \mathbb{R}^d} \left\| \frac{\boldsymbol{\varphi}(\mathbf{x})}{1 + \exp(-\boldsymbol{\varphi}(\mathbf{x})^\top \boldsymbol{\alpha})} \right\|_2 \leq m^{1/2} < \infty.$$

Thus, we have

$$\begin{aligned} \|\widehat{\boldsymbol{\alpha}}_{\text{LL}} - \boldsymbol{\alpha}_{\text{LL}}^*\|_2 &\leq \lambda^{-1}\omega(\mathbf{u}) \\ &= \mathcal{O}(\|\mathbf{u}_3\|_2 + \text{Lip}(u_4)) \end{aligned}$$

$$= \mathcal{O}_p(n^{-1/2} + n'^{-1/2})$$

by Lemma 2, Lemma 5, and Proposition 6.1 in Bonnans & Shapiro (1998, p. 19).

On the other hand,

$$|\widehat{J}_{\text{LL}}(\widehat{\boldsymbol{\alpha}}_{\text{LL}}) - J_{\text{LL}}(\boldsymbol{\alpha}_{\text{LL}}^*)| \leq |\widehat{J}_{\text{LL}}(\widehat{\boldsymbol{\alpha}}_{\text{LL}}) - \widehat{J}_{\text{LL}}(\boldsymbol{\alpha}_{\text{LL}}^*)| + |\widehat{J}_{\text{LL}}(\boldsymbol{\alpha}_{\text{LL}}^*) - J_{\text{LL}}(\boldsymbol{\alpha}_{\text{LL}}^*)|.$$

For the second term,

$$\begin{aligned} |\widehat{J}_{\text{LL}}(\boldsymbol{\alpha}_{\text{LL}}^*) - J_{\text{LL}}(\boldsymbol{\alpha}_{\text{LL}}^*)| &= |-\pi \mathbf{u}_3^\top \boldsymbol{\alpha}_{\text{LL}}^* + u_4(\boldsymbol{\alpha}_{\text{LL}}^*)| \\ &\leq \pi M_\alpha \|\mathbf{u}_3\|_2 + |u_4(\boldsymbol{\alpha}_{\text{LL}}^*)| \\ &= \mathcal{O}_p(n^{-1/2} + n'^{-1/2}) \end{aligned}$$

according to the central limit theorem. For the first term, it is a bit more complex:

$$\begin{aligned} |\widehat{J}_{\text{LL}}(\widehat{\boldsymbol{\alpha}}_{\text{LL}}) - \widehat{J}_{\text{LL}}(\boldsymbol{\alpha}_{\text{LL}}^*)| &\leq \left| \frac{\lambda}{2} (\widehat{\boldsymbol{\alpha}}_{\text{LL}} + \boldsymbol{\alpha}_{\text{LL}}^*)^\top (\widehat{\boldsymbol{\alpha}}_{\text{LL}} - \boldsymbol{\alpha}_{\text{LL}}^*) \right| + \left| \pi \left( \frac{1}{n} \sum_{i=1}^n \boldsymbol{\varphi}(\mathbf{x}_i) \right)^\top (\widehat{\boldsymbol{\alpha}}_{\text{LL}} - \boldsymbol{\alpha}_{\text{LL}}^*) \right| \\ &\quad + \frac{1}{n'} \sum_{i=1}^{n'} |\ln(1 + \exp(\boldsymbol{\varphi}(\mathbf{x}'_i)^\top \widehat{\boldsymbol{\alpha}}_{\text{LL}})) - \ln(1 + \exp(\boldsymbol{\varphi}(\mathbf{x}'_i)^\top \boldsymbol{\alpha}_{\text{LL}}^*))|. \end{aligned}$$

Let  $f(z, t) = \ln(1 + \exp(z + t))$ , then  $\lim_{t \rightarrow 0} f(z, t) = f(z, 0)$  and

$$\lim_{t \rightarrow 0} \frac{f(z, t) - f(z, 0)}{t} = \lim_{t \rightarrow 0} \frac{\partial}{\partial t} f(z, t) = \frac{1}{1 + \exp(-z - t)} < \infty,$$

where we use *L'Hôpital's rule*. In other words,  $f(z, t)$  approaches  $f(z, 0)$  in  $\mathcal{O}(t)$  as  $t \rightarrow 0$ . Subsequently, for any  $\mathbf{x} \in \mathbb{R}^d$ , by  $z = \boldsymbol{\varphi}(\mathbf{x})^\top \boldsymbol{\alpha}_{\text{LL}}^*$  and  $t = \boldsymbol{\varphi}(\mathbf{x})^\top \widehat{\boldsymbol{\alpha}}_{\text{LL}} - \boldsymbol{\varphi}(\mathbf{x})^\top \boldsymbol{\alpha}_{\text{LL}}^*$  we can obtain

$$\begin{aligned} |\ln(1 + \exp(\boldsymbol{\varphi}(\mathbf{x})^\top \widehat{\boldsymbol{\alpha}}_{\text{LL}})) - \ln(1 + \exp(\boldsymbol{\varphi}(\mathbf{x})^\top \boldsymbol{\alpha}_{\text{LL}}^*))| &= \mathcal{O}(|\boldsymbol{\varphi}(\mathbf{x})^\top \widehat{\boldsymbol{\alpha}}_{\text{LL}} - \boldsymbol{\varphi}(\mathbf{x})^\top \boldsymbol{\alpha}_{\text{LL}}^*|) \\ &= \mathcal{O}(m^{1/2} \|\widehat{\boldsymbol{\alpha}}_{\text{LL}} - \boldsymbol{\alpha}_{\text{LL}}^*\|_2), \end{aligned}$$

which results in  $|\widehat{J}_{\text{LL}}(\widehat{\boldsymbol{\alpha}}_{\text{LL}}) - \widehat{J}_{\text{LL}}(\boldsymbol{\alpha}_{\text{LL}}^*)| = \mathcal{O}_p(n^{-1/2} + n'^{-1/2})$ .  $\square$

### A.8. Proof of Theorem 8

The proof goes along the same line as that of Theorem 6. Let  $\mathbf{u}_3$  and  $u_5(\boldsymbol{\alpha})$  be defined as in Eq. (15). Note that the function  $\max\{0, (1+z)/2, z\}$  is piecewise linear in  $z$ , differentiable almost everywhere, and  $0 \leq (d/dz) \max\{0, (1+z)/2, z\} \leq 1$ . As a result,

$$\|\mathbf{u}_3\|_2 = \mathcal{O}_p(n^{-1/2}), \quad \text{Lip}(u_5) = \mathcal{O}_p(n'^{-1/2}),$$

as  $n, n' \rightarrow \infty$ , and

$$\begin{aligned} \|\widehat{\boldsymbol{\alpha}}_{\text{DH}} - \boldsymbol{\alpha}_{\text{DH}}^*\|_2 &\leq \lambda^{-1} \omega(\mathbf{u}) \\ &= \mathcal{O}(\|\mathbf{u}_3\|_2 + \text{Lip}(u_5)) \\ &= \mathcal{O}_p(n^{-1/2} + n'^{-1/2}) \end{aligned}$$

by Lemma 2, Lemma 7, and Proposition 6.1 in Bonnans & Shapiro (1998, p. 19).

On the other hand,

$$\begin{aligned} |\widehat{J}_{\text{DH}}(\widehat{\boldsymbol{\alpha}}_{\text{DH}}) - J_{\text{DH}}(\boldsymbol{\alpha}_{\text{DH}}^*)| &\leq |\widehat{J}_{\text{DH}}(\widehat{\boldsymbol{\alpha}}_{\text{DH}}) - \widehat{J}_{\text{DH}}(\boldsymbol{\alpha}_{\text{DH}}^*)| + |\widehat{J}_{\text{DH}}(\boldsymbol{\alpha}_{\text{DH}}^*) - J_{\text{DH}}(\boldsymbol{\alpha}_{\text{DH}}^*)| \\ &\leq \frac{1}{n'} \sum_{i=1}^{n'} |\max\{0, (1 + \boldsymbol{\varphi}(\mathbf{x}'_i)^\top \widehat{\boldsymbol{\alpha}}_{\text{LL}})/2, \boldsymbol{\varphi}(\mathbf{x}'_i)^\top \widehat{\boldsymbol{\alpha}}_{\text{LL}}\}| \end{aligned}$$

$$- \max\{0, (1 + \boldsymbol{\varphi}(\mathbf{x}'_i)^\top \boldsymbol{\alpha}_{\text{LL}}^*)/2, \boldsymbol{\varphi}(\mathbf{x}'_i)^\top \boldsymbol{\alpha}_{\text{LL}}^*\} + \mathcal{O}_p(n^{-1/2} + n'^{-1/2}).$$

Let  $f(z, t) = \max\{0, (1 + z + t)/2, z + t\}$ , then  $\lim_{t \rightarrow 0} f(z, t) = f(z, 0)$  and for  $z \in \mathbb{R} \setminus \{0, 1\}$ ,

$$\lim_{t \rightarrow 0} \frac{f(z, t) - f(z, 0)}{t} = \lim_{t \rightarrow 0} \frac{\partial}{\partial t} f(z, t) \in \left\{0, \frac{1}{2}, 1\right\}.$$

In other words,  $f(z, t)$  approaches  $f(z, 0)$  in  $\mathcal{O}(t)$  as  $t \rightarrow 0$  almost surely. Subsequently, for any  $\mathbf{x} \in \mathbb{R}^d$ , by  $z = \boldsymbol{\varphi}(\mathbf{x})^\top \boldsymbol{\alpha}_{\text{DH}}^*$  and  $t = \boldsymbol{\varphi}(\mathbf{x})^\top \widehat{\boldsymbol{\alpha}}_{\text{DH}} - \boldsymbol{\varphi}(\mathbf{x})^\top \boldsymbol{\alpha}_{\text{DH}}^*$  we can obtain

$$\begin{aligned} |\max\{0, (1 + \boldsymbol{\varphi}(\mathbf{x})^\top \widehat{\boldsymbol{\alpha}}_{\text{LL}})/2, \boldsymbol{\varphi}(\mathbf{x})^\top \widehat{\boldsymbol{\alpha}}_{\text{LL}}\} - \max\{0, (1 + \boldsymbol{\varphi}(\mathbf{x})^\top \boldsymbol{\alpha}_{\text{LL}}^*)/2, \boldsymbol{\varphi}(\mathbf{x})^\top \boldsymbol{\alpha}_{\text{LL}}^*\}| &= \mathcal{O}(|\boldsymbol{\varphi}(\mathbf{x})^\top \widehat{\boldsymbol{\alpha}}_{\text{LL}} - \boldsymbol{\varphi}(\mathbf{x})^\top \boldsymbol{\alpha}_{\text{LL}}^*|) \\ &= \mathcal{O}(m^{1/2} \|\widehat{\boldsymbol{\alpha}}_{\text{LL}} - \boldsymbol{\alpha}_{\text{LL}}^*\|_2) \\ &= \mathcal{O}_p(n^{-1/2} + n'^{-1/2}), \end{aligned}$$

which completes the proof.  $\square$

## B. Optimization problems

In this section, we give exact optimization problems for the optimization methods presented in the paper. The logistic regression and logistic loss method is solved with a quasi-Newton method, and therefore we provide the derivatives in Sec. B.1.

The Hinge loss and Double Hinge loss result in quadratic problems. The ramp-loss is solved via a sequence of quadratic problems. All quadratic problems are expressed in the form

$$\begin{aligned} \min_{\boldsymbol{\alpha}} \quad & \frac{1}{2} \boldsymbol{\alpha}^\top H \boldsymbol{\alpha} + \mathbf{f}^\top \boldsymbol{\alpha} \\ \text{s.t.} \quad & L \boldsymbol{\alpha} \preceq \mathbf{k} \\ & \mathbf{l} \preceq \boldsymbol{\alpha} \end{aligned}$$

This standard form can then just be plugged into an off-the-shelf optimization package such as Gurobi, IBM CPLEX or MATLAB's internal 'quadprog' function.

### B.1. Logistic loss

The gradient for the objective function in Eq. (8) is

$$\begin{aligned} \frac{\partial \widehat{J}_{\text{LL}}(\boldsymbol{\alpha}, b)}{\partial \boldsymbol{\alpha}} &= -\frac{\pi}{n} \Phi_{\text{p}}^\top \mathbf{1} + \lambda \boldsymbol{\alpha} \\ &\quad - \frac{1}{n'} \sum_{j=1}^{n'} \ell'_{\text{LL}}(-\boldsymbol{\alpha}^\top \boldsymbol{\varphi}(\mathbf{x}'_j) - b) \boldsymbol{\varphi}(\mathbf{x}'_j), \end{aligned}$$

where  $\ell'_{\text{LL}}(z)$  is the derivative of  $\ell_{\text{LL}}(z)$ :

$$\ell'_{\text{LL}}(z) = -\frac{\exp(-z)}{1 + \exp(-z)}.$$

The derivative with respect to the unregularized constant  $b$  is

$$\frac{\partial \widehat{J}_{\text{LL}}(\boldsymbol{\alpha}, b)}{\partial b} = -\pi - \frac{1}{n'} \sum_{j=1}^{n'} \ell'_{\text{LL}}(-\boldsymbol{\alpha}^\top \boldsymbol{\varphi}(\mathbf{x}'_j) - b).$$

### B.2. Double Hinge Loss - PU Learning

The objective function can be expressed as

$$-\frac{\pi}{n} \sum_{i=1}^n g(\mathbf{x}_i) + \frac{1}{n'} \sum_{j=1}^{n'} \max\left(0, \max\left(g(\mathbf{x}'_j), \frac{1}{2} + \frac{1}{2}g(\mathbf{x}'_j)\right)\right) + \frac{\lambda}{2} \|g\|_2^2$$

$$= -\frac{\pi}{n} \sum_{i=1}^n \left( \sum_{\ell=1}^m \alpha_{\ell} \varphi_{\ell}(\mathbf{x}_i) + b \right) + \frac{1}{n'} \sum_{j=1}^{n'} \max \left( 0, \max \left( \sum_{\ell=1}^m \alpha_{\ell} \varphi_{\ell}(\mathbf{x}'_j) + b, \frac{1}{2} + \frac{1}{2} \left( \sum_{\ell=1}^m \alpha_{\ell} \varphi_{\ell}(\mathbf{x}'_j) + b \right) \right) \right) + \frac{\lambda}{2} \sum_{\ell=1}^m \alpha_{\ell}^2$$

The objective function can then be expressed as

$$\begin{aligned} \min_{\alpha, b, \xi} \quad & -\frac{\pi}{n} \mathbf{1}^{\top} \Phi_{\text{P}} \alpha - \pi b + \frac{1}{n'} \mathbf{1}^{\top} \xi + \frac{\lambda}{2} \alpha^{\top} \alpha \\ \text{s.t.} \quad & \xi \succeq \mathbf{0}, \\ & \xi \succeq \frac{1}{2} \mathbf{1} + \frac{1}{2} \Phi_{\text{U}} \alpha + \frac{1}{2} b \mathbf{1}, \\ & \xi \succeq \Phi_{\text{U}} \alpha + b \mathbf{1}, \end{aligned}$$

Let

$$\gamma = \begin{bmatrix} \alpha_{b \times 1} \\ b \\ \xi_{n' \times 1} \end{bmatrix}.$$

Then  $H$  is defined as

$$H = \begin{bmatrix} \lambda I_{m \times m} & O_{m \times 1} & O_{m' \times n'} \\ O_{1 \times m} & 0 & O_{1 \times n'} \\ O_{n' \times m} & O_{n' \times 1} & O_{n' \times n'} \end{bmatrix},$$

where  $O_{n \times m}$  is a zero matrix of  $n$  rows and  $m$  columns. The linear part of the objective is

$$\mathbf{f} = \begin{bmatrix} -\frac{\pi}{n} \Phi_{\text{P}}^{\top} \mathbf{1} \\ -\pi \\ \frac{1}{n'} \mathbf{1}_{n' \times 1} \end{bmatrix}$$

The lower-bound is

$$\mathbf{l} = \begin{bmatrix} -\infty_{m \times 1} \\ -\infty \\ \mathbf{0}_{n' \times 1} \end{bmatrix}.$$

The first linear constraint is

$$\begin{aligned} \xi &\succeq \frac{1}{2} \mathbf{1} + \frac{1}{2} \Phi_{\text{U}} \alpha + \frac{1}{2} b \mathbf{1} \\ \frac{1}{2} \Phi_{\text{U}} \alpha + \frac{1}{2} b \mathbf{1} - \xi &\preceq -\frac{1}{2} \mathbf{1} \\ \left[ \frac{1}{2} \Phi_{\text{U}} \quad \frac{1}{2} \mathbf{1}_{n' \times 1} \quad -I_{n' \times n'} \right] \begin{bmatrix} \alpha \\ u \\ \xi \end{bmatrix} &\preceq -\frac{1}{2} \mathbf{1}_{n' \times 1}. \end{aligned}$$

The second linear constraint is

$$\begin{aligned} \xi &\succeq \Phi_{\text{U}} \alpha + b \mathbf{1} \\ \Phi_{\text{U}} \alpha + b \mathbf{1} - \xi &\preceq \mathbf{0}_{n' \times 1} \\ \left[ \Phi_{\text{U}} \quad \mathbf{1}_{n' \times 1} \quad -I_{n' \times n'} \right] \begin{bmatrix} \alpha \\ b \\ \xi \end{bmatrix} &\preceq \mathbf{0}_{n' \times 1}. \end{aligned}$$

Combining the two sets of inequalities, we get

$$L = \begin{bmatrix} \frac{1}{2} \Phi_{\text{U}} & \frac{1}{2} \mathbf{1}_{n' \times 1} & -I_{n' \times n'} \\ \Phi_{\text{U}} & \mathbf{1}_{n' \times 1} & -I_{n' \times n'} \end{bmatrix},$$

and

$$\mathbf{k} = \begin{bmatrix} -\frac{1}{2} \mathbf{1}_{n' \times 1} \\ \mathbf{0}_{n' \times 1} \end{bmatrix}.$$

### B.3. Weighted hinge loss classifier

We want a cost-sensitive classifier with a per-sample weighting. Using the model

$$g(\mathbf{x}) = \sum_{\ell=1}^m \alpha_{\ell} \varphi_{\ell}(\mathbf{x}) + b,$$

where

$$\{\mathbf{c}_1, \dots, \mathbf{c}_m\} := \{\mathbf{x}_1, \dots, \mathbf{x}_n\},$$

we wish to minimize

$$\begin{aligned} J(g) &= \frac{1}{n} \sum_{i=1}^n w_i \ell_H \left( y_i \sum_{\ell=1}^m \alpha_{\ell} \varphi_{\ell}(\mathbf{x}_i) + b \right) + \frac{\lambda}{2} \boldsymbol{\alpha}^{\top} \boldsymbol{\alpha}, \\ &= \frac{1}{2n} \sum_{i=1}^n w_i \max \left( 0, 1 - y_i \sum_{\ell=1}^m \alpha_{\ell} \varphi_{\ell}(\mathbf{x}_i) + b \right) + \frac{\lambda}{2} \boldsymbol{\alpha}^{\top} \boldsymbol{\alpha}. \end{aligned}$$

This gives a QP of

$$\begin{aligned} \min_{\boldsymbol{\alpha}, b, \boldsymbol{\xi}} \quad & \frac{1}{2n} \mathbf{w}^{\top} \boldsymbol{\xi} + \frac{\lambda}{2} \boldsymbol{\alpha}^{\top} R \boldsymbol{\alpha} \\ \text{s.t.} \quad & \xi_i \geq 0, \quad \forall i = 1, \dots, n \\ & \xi_i \geq 1 - y_i \sum_{\ell=1}^m \alpha_{\ell} k(\mathbf{x}_i, \mathbf{c}_{\ell}) + u \quad \forall i = 1, \dots, n. \end{aligned}$$

We then set

$$\boldsymbol{\gamma} = \begin{bmatrix} \boldsymbol{\alpha} \\ b \\ \boldsymbol{\xi} \end{bmatrix}.$$

$H$  is then

$$H = \begin{bmatrix} \lambda I & O_{m \times 1} & O_{m \times n} \\ O_{1 \times n} & 0 & O_{1 \times n} \\ O_{n \times n} & O_{n \times 1} & O_{n \times n} \end{bmatrix}.$$

The linear term is

$$\mathbf{f} = \begin{bmatrix} \mathbf{0}_{m \times 1} \\ 0 \\ \frac{1}{2n} \mathbf{w} \end{bmatrix}$$

The lower bound is

$$\mathbf{l} = \begin{bmatrix} -\infty_{m \times 1} \\ -\infty \\ \mathbf{0}_{n \times 1} \end{bmatrix}$$

Define  $\bar{\Phi}$  as

$$\bar{\Phi}_{i\ell} = y_i \varphi_{\ell}(\mathbf{x}_i).$$

The constraint can be written in matrix form as

$$\begin{aligned} \boldsymbol{\xi} &\succeq \mathbf{1}_{n \times 1} - (\bar{\Phi} \boldsymbol{\alpha} + b \mathbf{y}) \\ -\bar{\Phi} \boldsymbol{\alpha} - b \mathbf{y} - \boldsymbol{\xi} &\preceq -\mathbf{1}_{n \times 1} \end{aligned}$$

The matrix is then

$$L = \begin{bmatrix} -\bar{\Phi} & -\mathbf{y} & -I_{n \times n} \end{bmatrix},$$

and  $\mathbf{k}$  is

$$\mathbf{k} = [-\mathbf{1}_{n \times 1}].$$

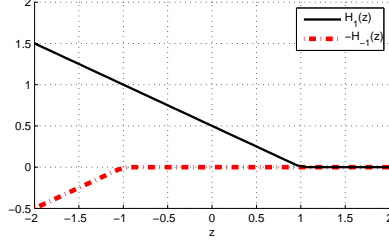

Figure 6. Decomposition of the ramp-loss into convex and concave parts.

#### B.4. Weighted ramp-loss classifier (CCCP)

Classification with the ramp-loss is difficult, due to the non-convexity of the loss function. One popular method to perform optimization is to split the non-convex function into a convex and concave part. The concave part is then upper-bounded by a linear function, and optimization is iteratively performed: minimization of the upper-bound, and tightening of the upper-bound around the new minima. We minimize the ramp-loss problem here using this approach. This is a straightforward application of the convex-concave procedure (CCCP) in Yuille & Rangarajan (2002) and is essentially the same as Collobert et al. (2006).

We wish to minimize the following non-convex objective function:

$$J(\boldsymbol{\alpha}, b) = \frac{1}{n} \sum_{i=1}^n w_i \ell_R \left( y_i \sum_{\ell=1}^m \alpha_\ell \varphi_\ell(\mathbf{x}_i) + b \right) + \frac{\lambda}{2} \boldsymbol{\alpha}^\top \boldsymbol{\alpha}, \quad (16)$$

where the ramp loss  $\ell_R(z)$  is defined as

$$\ell_R(z) = \max \left( 0, \min \left( 1, \frac{1}{2} - \frac{1}{2}z \right) \right) = \frac{1}{2} \max(0, \min(2, 1 - z)).$$

By defining the following (slightly more general) hinge loss

$$H_\epsilon(z) = \frac{1}{2} \max(0, \epsilon - z),$$

the ramp loss  $\ell_R(z)$  can be decomposed as:

$$\ell_R(z) = H_1(z) - H_{-1}(z).$$

This is illustrated in Fig. 6. The objective Eq. (16) can therefore be decomposed as

$$\begin{aligned} J(\boldsymbol{\alpha}, b) &= J_{\text{vex}}(\boldsymbol{\alpha}, b) + J_{\text{cave}}(\boldsymbol{\alpha}, b), \\ J_{\text{vex}}(\boldsymbol{\alpha}, b) &= \frac{1}{n} \sum_{i=1}^n w_i H_1 \left( \sum_{\ell=1}^m \alpha_\ell \varphi_\ell(\mathbf{x}_i) + b \right) + \frac{\lambda}{2} \boldsymbol{\alpha}^\top \boldsymbol{\alpha}, \\ J_{\text{cave}}(\boldsymbol{\alpha}, b) &= -\frac{1}{n} \sum_{i=1}^n w_i H_{-1} \left( \sum_{\ell=1}^m \alpha_\ell \varphi_\ell(\mathbf{x}_i) + b \right) \end{aligned}$$

The following self-evident relation can be used to upper-bound the concave part

$$\begin{aligned} tz - f(z) &\leq \sup_{y \in \mathbb{R}} yt - f(y) \\ \Rightarrow f(z) &\geq tz - f^*(t), \end{aligned} \quad (17)$$

where

$$f^*(t) = \sup_{y \in \mathbb{R}} yt - f(y).$$

The inequality in Eq.(17) is known as the *Fenchel inequality* and the function  $f^*(z)$  is known as the *Fenchel dual* or *convex conjugate*. Applying the above inequality to  $H_\epsilon(z)$ , we can obtain a bound as

$$\begin{aligned} H_\epsilon(z) &\geq zt - H_\epsilon^*(t), \\ -H_\epsilon(z) &\leq H_\epsilon^*(t) - zt, \end{aligned}$$

where  $H_\epsilon^*(t)$  is the Fenchel dual of  $H_\epsilon(z)$ . The Fenchel dual of  $H_{-1}(t)$  is (the full calculation is given in Appendix B.4.3)

$$H_{-1}^*(t) = \begin{cases} -t & -\frac{1}{2} \leq t \leq 0, \\ \infty & \text{otherwise.} \end{cases}$$

We can minimize the upper-bound as

$$\arg \min_t H_{-1}^*(t) - tz = \begin{cases} t = 0 & z > -1. \\ t = -\frac{1}{2} & z \leq -1. \end{cases}$$

The concave part is then bounded, with the parameter  $\mathbf{a}$  as

$$\bar{J}_{\text{cave}}(\boldsymbol{\alpha}, b, \mathbf{a}) = \frac{1}{n} \sum_{i=1}^n w_i \left( H_{-1}^*(a_i) - a_i y_i \left( \sum_{\ell=1}^m \alpha_\ell \varphi_\ell(\mathbf{x}_i) + b \right) \right),$$

where  $J_{\text{cave}}(\boldsymbol{\alpha}, u) \leq \bar{J}_{\text{cave}}(\boldsymbol{\alpha}, b, \mathbf{a})$ , for any  $\mathbf{a}$ .

#### B.4.1. TIGHTENING OF THE UPPER-BOUND

The upperbound is minimized (tightened) when

$$a_i = \begin{cases} -\frac{1}{2} & y_i \left( \sum_{\ell=1}^m \alpha_\ell \varphi_\ell(\mathbf{x}_i) + b \right) \leq -1, \\ 0 & \text{otherwise.} \end{cases}$$

#### B.4.2. MINIMIZING THE OBJECTIVE

We wish to minimize the convex part and the upper bound  $\bar{J}(\boldsymbol{\alpha}, u, \mathbf{a}) = J_{\text{vex}}(\boldsymbol{\alpha}, u) + \bar{J}_{\text{cave}}(\boldsymbol{\alpha}, u, \mathbf{a})$  with respect to  $\mathbf{a}$ . This gives an objective of

$$\bar{J}(\boldsymbol{\alpha}, b, \mathbf{a}) = \frac{1}{n} \sum_{i=1}^n w_i H_{-1} \left( y_i \left( \sum_{\ell=1}^m \alpha_\ell \varphi_\ell(\mathbf{x}_i) + b \right) \right) + \frac{\lambda}{2} \boldsymbol{\alpha}^\top \boldsymbol{\alpha} - \frac{1}{n} \sum_{i=1}^n w_i a_i y_i \left( \sum_{\ell=1}^m \alpha_\ell \varphi_\ell(\mathbf{x}_i) + b \right).$$

We define the following matrices:

$$\begin{aligned} \Phi_{i,\ell} &= y_i k(\mathbf{x}_i, \mathbf{c}_\ell), \\ \bar{\Phi}_{i,\ell} &= w_i a_i y_i k(\mathbf{x}_i, \mathbf{c}_\ell), \end{aligned}$$

The QP for this is then

$$\begin{aligned} \min_{\boldsymbol{\alpha}, b, \boldsymbol{\xi}} & \frac{1}{2n} \mathbf{w}^\top \boldsymbol{\xi} + \frac{\lambda}{2} \boldsymbol{\alpha}^\top \boldsymbol{\alpha} - \frac{1}{n} \mathbf{1}^\top \bar{\Phi} \boldsymbol{\alpha} - b \frac{1}{n} \sum_{i=1}^n w_i a_i y_i. \\ \text{s.t.} & \xi_i \geq 0 \quad \forall i = 1, \dots, n \\ & \xi_i \geq 1 - y_i \left( \sum_{\ell=1}^m \alpha_\ell \varphi_\ell(\mathbf{x}_i) + b \right) \quad \forall i = 1, \dots, n. \end{aligned}$$

We define again

$$\boldsymbol{\gamma} = \begin{bmatrix} \boldsymbol{\alpha} \\ b \\ \boldsymbol{\xi} \end{bmatrix}.$$



The quadratic term is

$$H = \begin{bmatrix} \lambda I_{m \times m} & O_{m \times 1} & O_{n \times n} \\ O_{1 \times n} & 0 & O_{1 \times n} \\ O_{n \times n} & O_{n \times 1} & O_{n \times n} \end{bmatrix}.$$

The linear term is

$$\mathbf{f} = \begin{bmatrix} -\frac{1}{n} \bar{\Phi}^\top \mathbf{1} \\ -\frac{1}{n} \sum_{i=1}^n w_i a_i y_i \\ \frac{1}{2n} \mathbf{w} \end{bmatrix}$$

The lower-bound is

$$lb = \begin{bmatrix} -\infty_{m \times 1} \\ -\infty \\ \mathbf{0}_{n \times 1} \end{bmatrix}.$$

The linear term is

$$-\Phi \alpha - b \mathbf{y} - \xi \preceq -\mathbf{1}_{n \times 1}.$$

This gives a matrix of

$$L = \begin{bmatrix} -\Phi & -\mathbf{y} & -I_{n \times n} \end{bmatrix},$$

and  $\mathbf{k}$  is

$$\mathbf{k} = [-\mathbf{1}_{n \times 1}].$$

#### B.4.3. CALCULATION OF THE FENCHEL DUAL OF $H_\epsilon(z)$

In this section, we briefly give the derivation of the Fenchel dual of  $H_\epsilon(z)$

$$\begin{aligned} H_\epsilon^*(t) &= \sup_v tv - H_\epsilon(v) \\ &= \sup_v tv - \frac{1}{2} \max(0, \epsilon - v). \end{aligned}$$

To make the above easier, we split the domain of the  $v$ :

$$\begin{aligned} H_\epsilon^*(t) &= \max \left( \sup_{v \leq \epsilon} tv - \frac{1}{2} \max(0, \epsilon - v), \sup_{v > \epsilon} tv - \frac{1}{2} \max(0, \epsilon - v) \right), \\ &= \max \left( \sup_{v \leq \epsilon} tv - \frac{1}{2} (\epsilon - v), \sup_{v > \epsilon} tv \right). \end{aligned}$$

For the first part:

$$\begin{aligned} \sup_{v \leq \epsilon} tv - \frac{1}{2} (\epsilon - v) &= \sup_{v \leq \epsilon} v \left( t + \frac{1}{2} \right) - \frac{1}{2} \epsilon, \\ &= \begin{cases} \epsilon t & t \geq -\frac{1}{2}, \\ \infty & t < -\frac{1}{2} \end{cases} \end{aligned}$$

The second part is

$$\sup_{t > \epsilon} tv = \begin{cases} \epsilon v & t \leq 0, \\ \infty & t > 0. \end{cases}$$

Putting these two together gives:

$$H_\epsilon^*(t) = \begin{cases} \epsilon t & -\frac{1}{2} \leq t \leq 0, \\ \infty & \text{otherwise.} \end{cases}$$
